# Supplementary material
Source: publisher figshare collection journal article supplement (https://acs.figshare.com/ndownloader/files/4562206)
Supplement: Supplementary file 1 [file 4562206]

## Leakage and Proton Conductivity in the Predicted Ferroelectric CsBiNb<sub>2</sub>O<sub>7</sub>

Richard J Goff<sup>1</sup>, Dean Keeble<sup>2</sup>, Pamela A Thomas<sup>2</sup>, Clemens Ritter<sup>3</sup>, Finlay D Morrison<sup>1</sup> and Philip Lightfoot<sup>1\*</sup>

<sup>1</sup> EaStChem, School of Chemistry, University of St Andrews, St Andrews, Fife, KY16 9ST, UK.

<sup>2</sup> Department of Physics, University of Warwick, Coventry, CV4 7AL, UK.

<sup>3</sup> Institut Laue Langevin, BP 156, 38042, Grenoble Cedex 9, France.

\*Corresponding author, e-mail: [pl@st-and.ac.uk](mailto:pl@st-and.ac.uk)

### Supplementary material

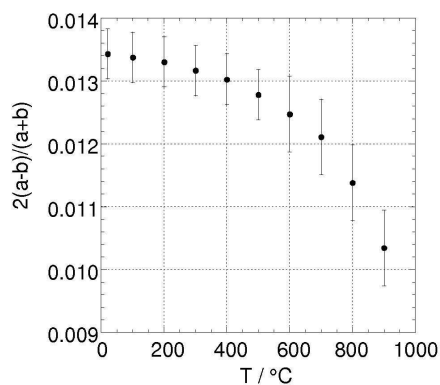

**Figure S1.** Orthorhombic distortion versus temperature for CsBiNb<sub>2</sub>O<sub>7</sub>

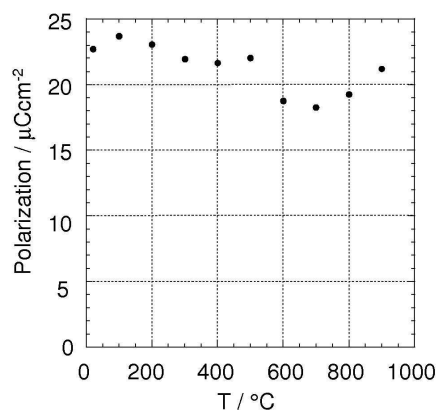

**Figure S2.** Calculated total ionic polarisation versus temperature for CsBiNb<sub>2</sub>O<sub>7</sub>

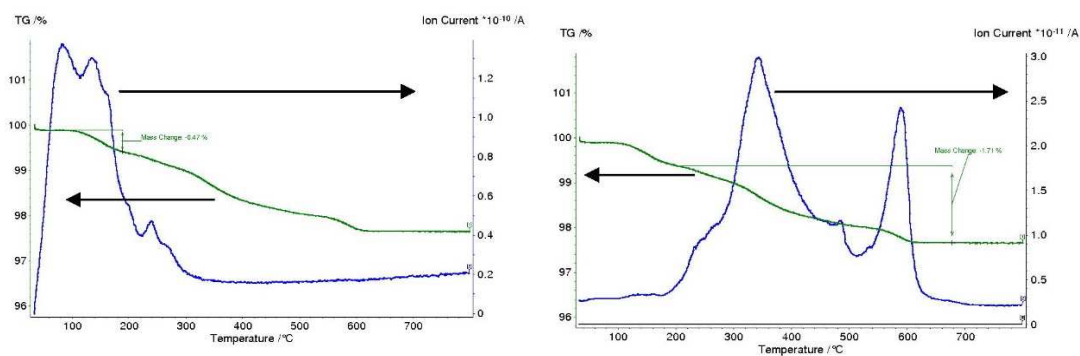

**Figure S3.** TGA-MS spectra for ‘wet’ CsBiNb<sub>2</sub>O<sub>7</sub>. (a) H<sub>2</sub>O loss (b) CO<sub>2</sub> loss.

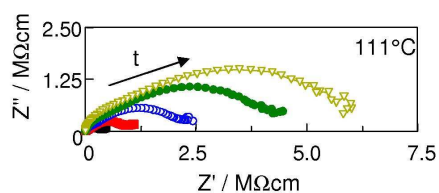

**Figure S4.**  $Z^*$  plot as a function of time for data obtained at 111 °C in dry flowing N<sub>2</sub>.

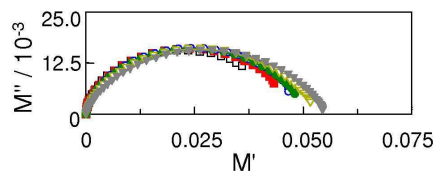

**Figure S5.**  $M^*$  plots for data obtained in dry flowing N<sub>2</sub> at 155 (▼), 206 (▽), 260 (●), 291 (○), 326 (■) and 384 (□) °C.

The effect of changing the N<sub>2</sub> flow from dry to wet is shown in the form of combined spectroscopic  $Z''$ ,  $M''$  plots (Figure S6). The decrease in magnitude of  $Z''$  shows the dramatic decrease in  $R_T$  and  $R_{gb}$  caused by the introduction of ionic conductivity. The height of bulk  $M''$  peak remains constant indicating that  $C_b$  remains unchanged but the displacement of the peak to higher frequency with time indicates that the bulk conductivity is also increasing as moisture is introduced.

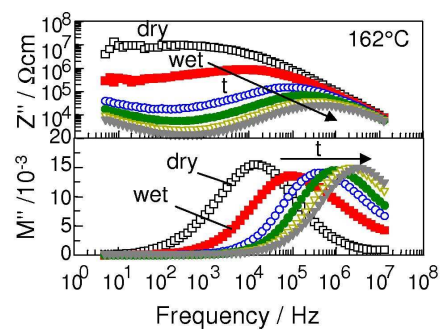

**Figure S6.** Spectroscopic  $Z''$ ,  $M''$  plots for data collected at 162 °C in dry  $N_2$  ( $\square$ ) and as a function of time in  $N_2$  passed through steam. Time intervals are *ca.* 10 mins. (Note logarithmic scale of  $Z''$  data.)

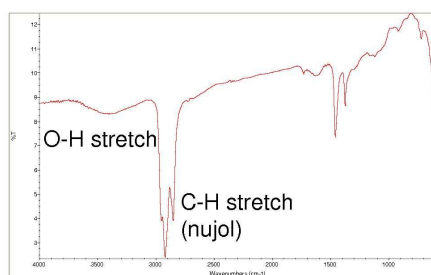

**Figure S7.** Typical IR spectrum for  $CsBiNb_2O_7$  at 25 °C, exposed to air.
